# Supplementary material for: CLAME: a new alignment-based binning algorithm allows the genomic description of a novel Xanthomonadaceae from the Colombian Andes
Source: PubMed Central journal article supplement (PMC6288851; doi:10.1186/s12864-018-5191-y), 2018-12-11

## Stage 1: Read alignment

- R0 █
- R1 █
- R2 █
- R3 █
- R4 █
- R5 █
- R6 █
- R7 █
- R8 █
- R9 █

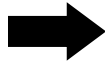

All to all alignment  
using suffix tree

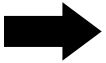

| V | E                    |
|---|----------------------|
| 0 | ['2', '3', '7', '4'] |
| 1 | ['2', '5', '8', '9'] |
| 2 | ['0', '1']           |
| 3 | ['0', '4', '7']      |
| 4 | ['0', '3', '7']      |
| 5 | ['1', '6', '8', '9'] |
| 6 | ['5', '8', '9']      |
| 7 | ['0', '3', '4']      |
| 8 | ['1', '5', '6']      |
| 9 | ['1', '5', '6']      |

## Stage 2: Edges analysis

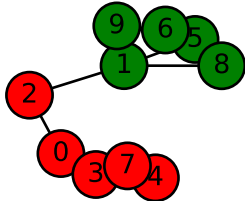

$G=(V,E)$   
 $V$ =Reads  
 $E$ =Reads alignments

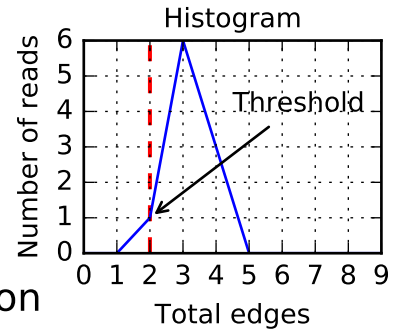

## Stage 3: Graph traversal and bin generation

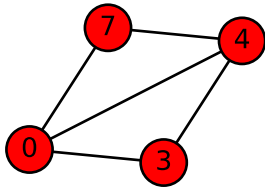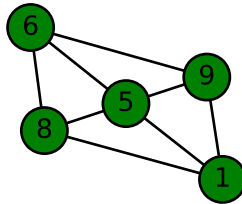

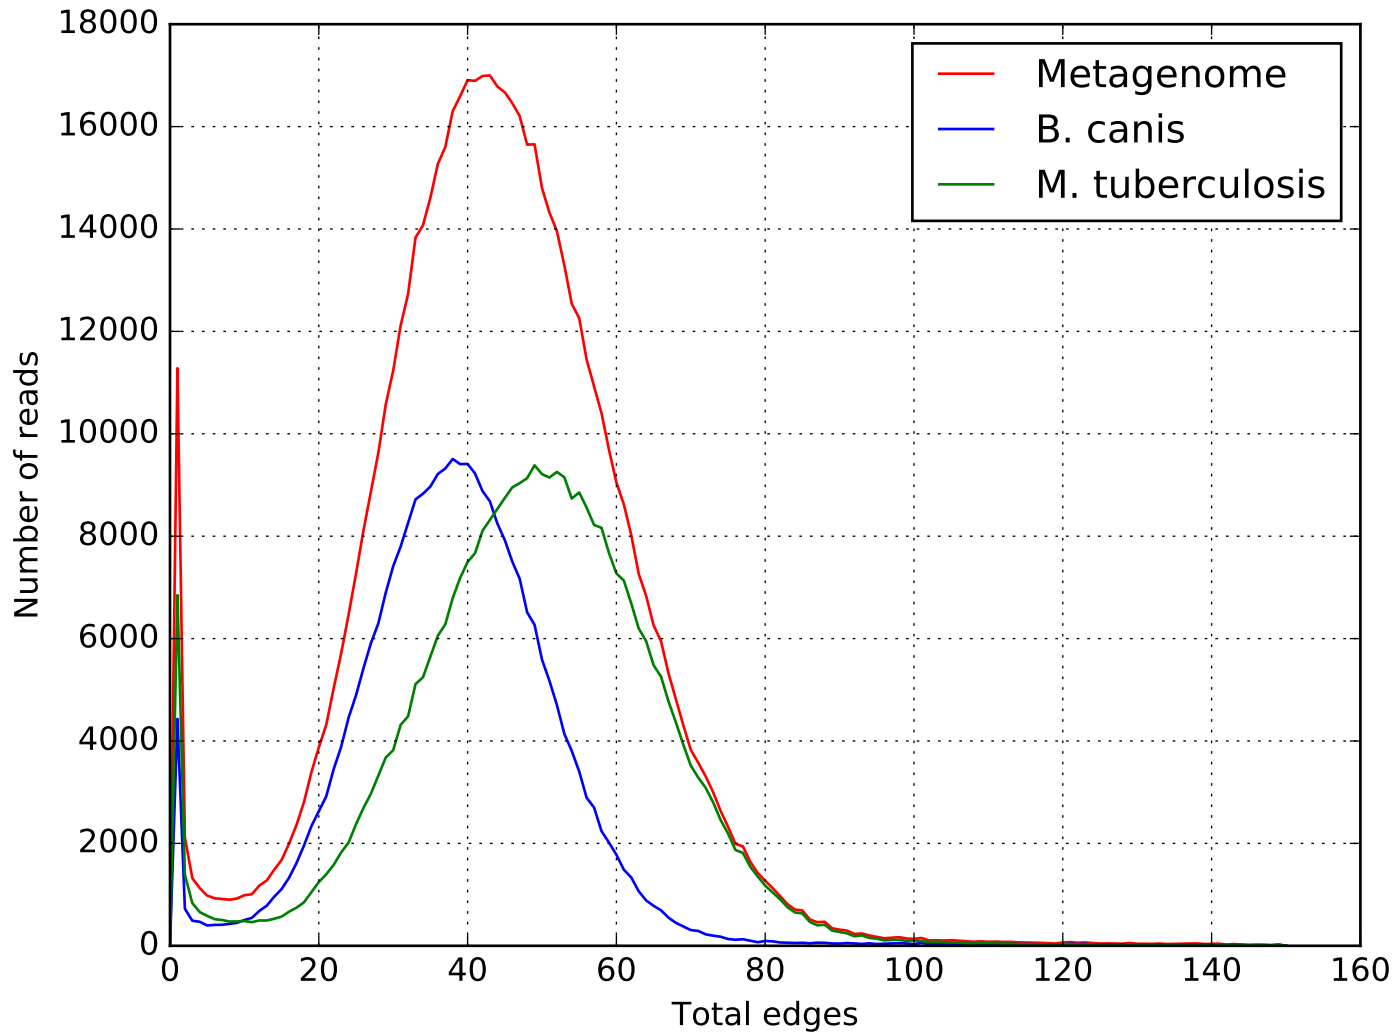

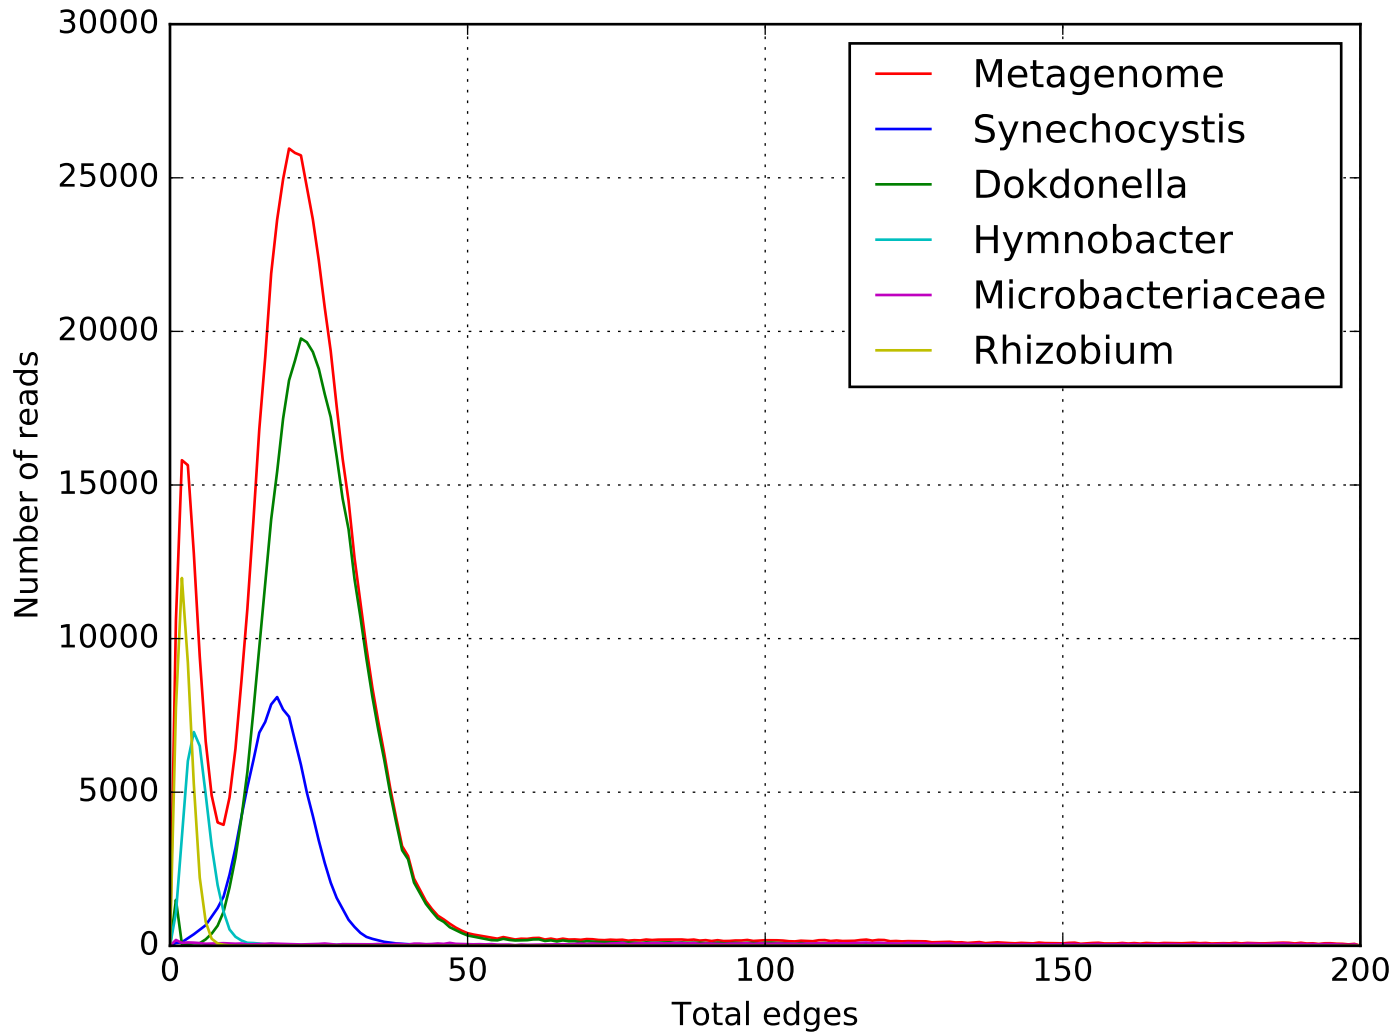

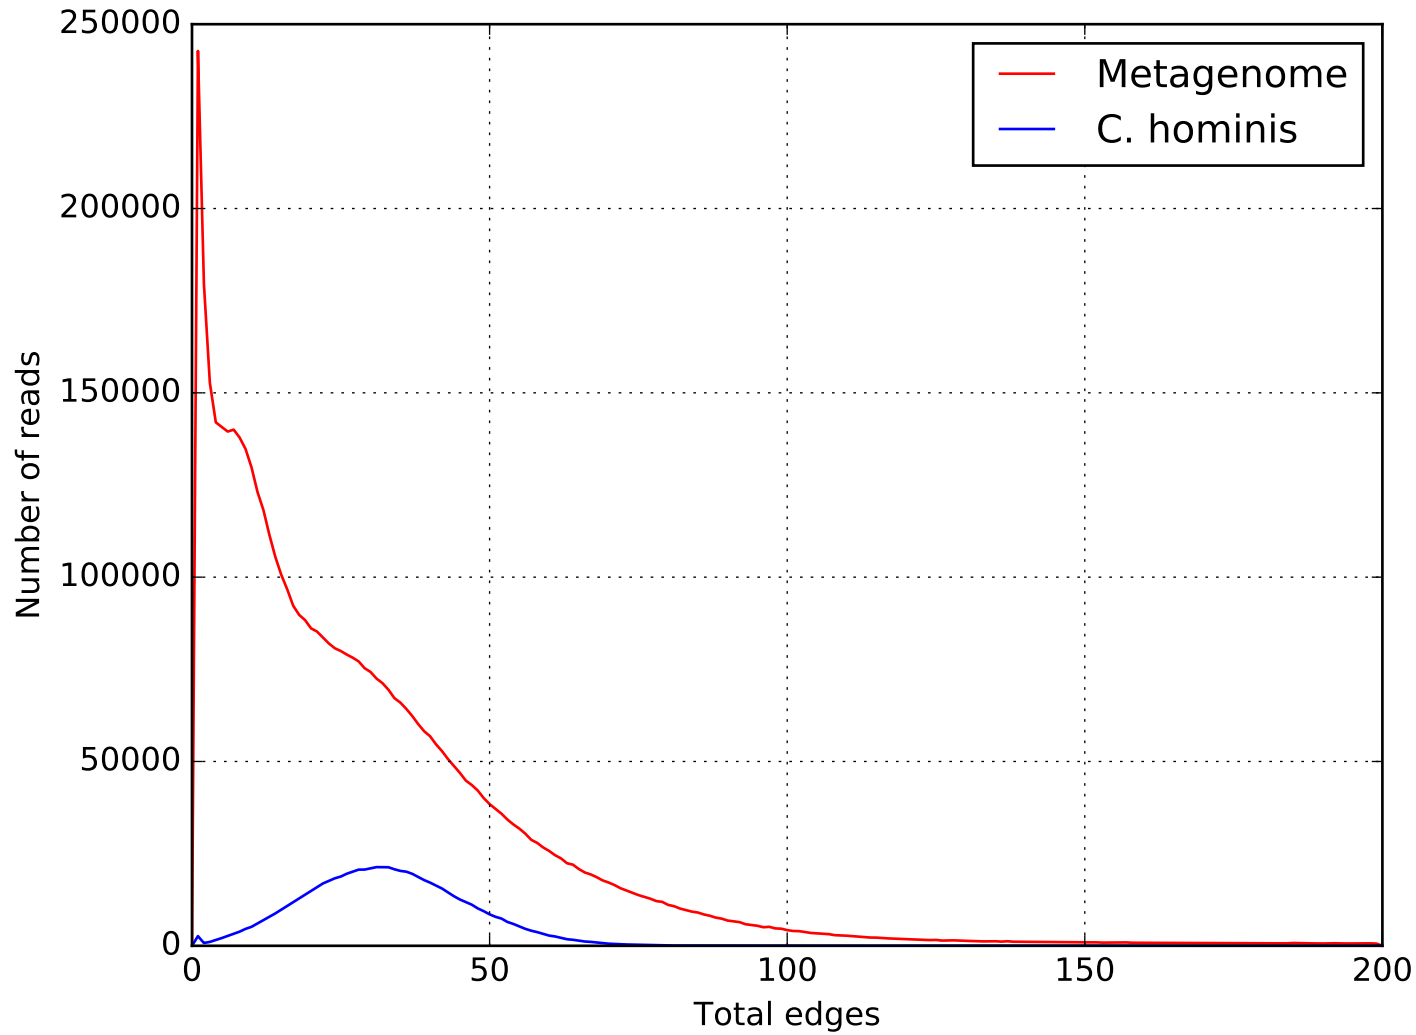

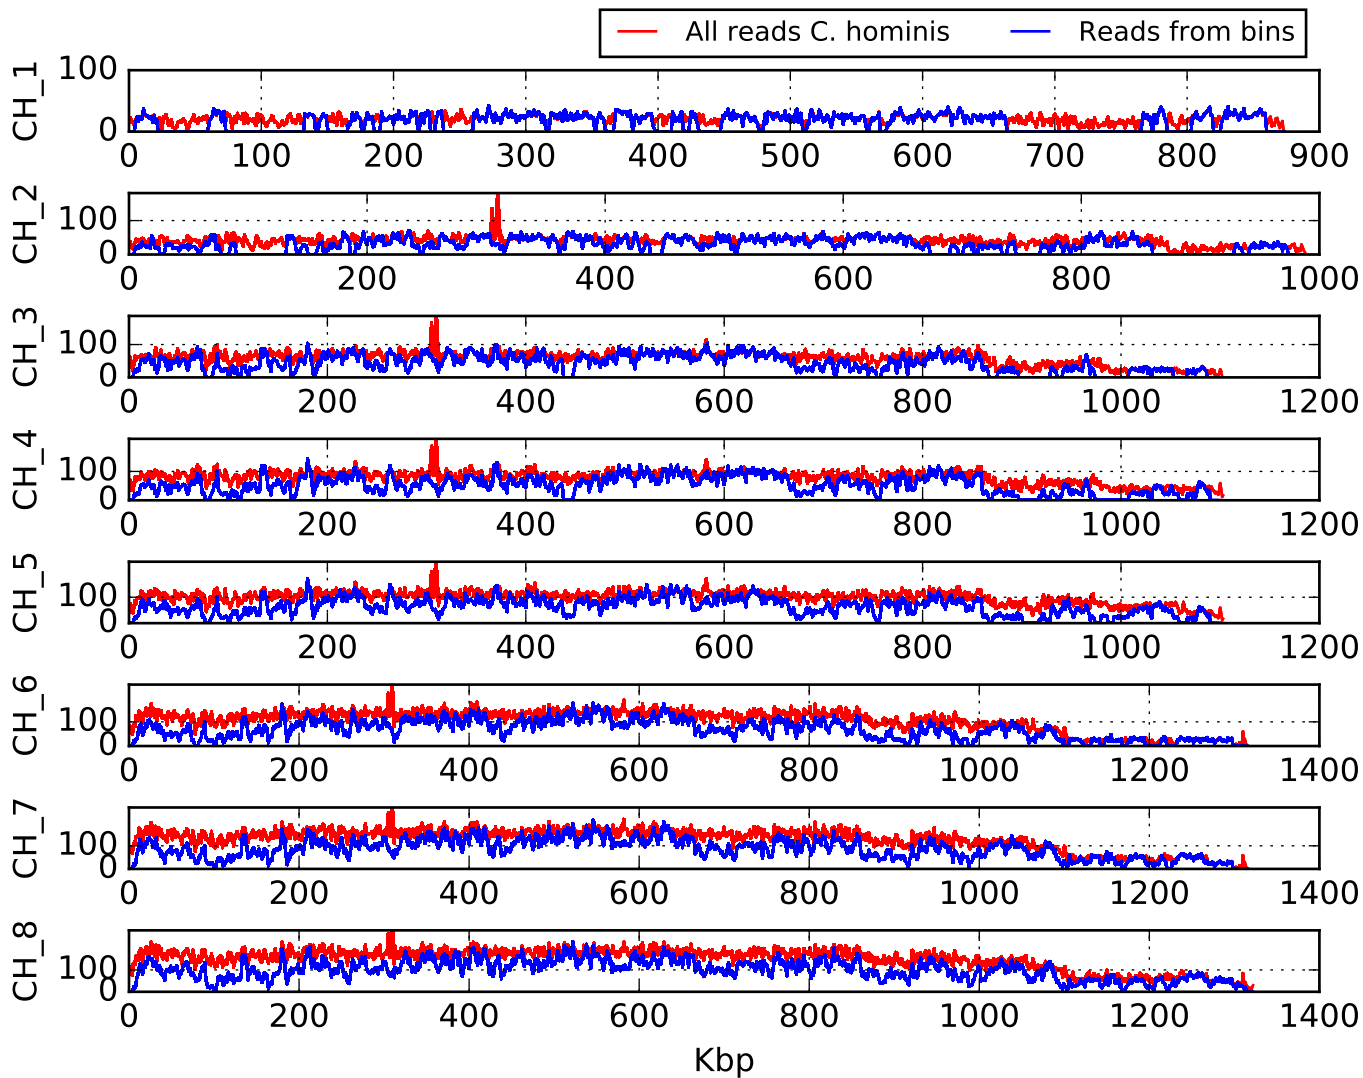

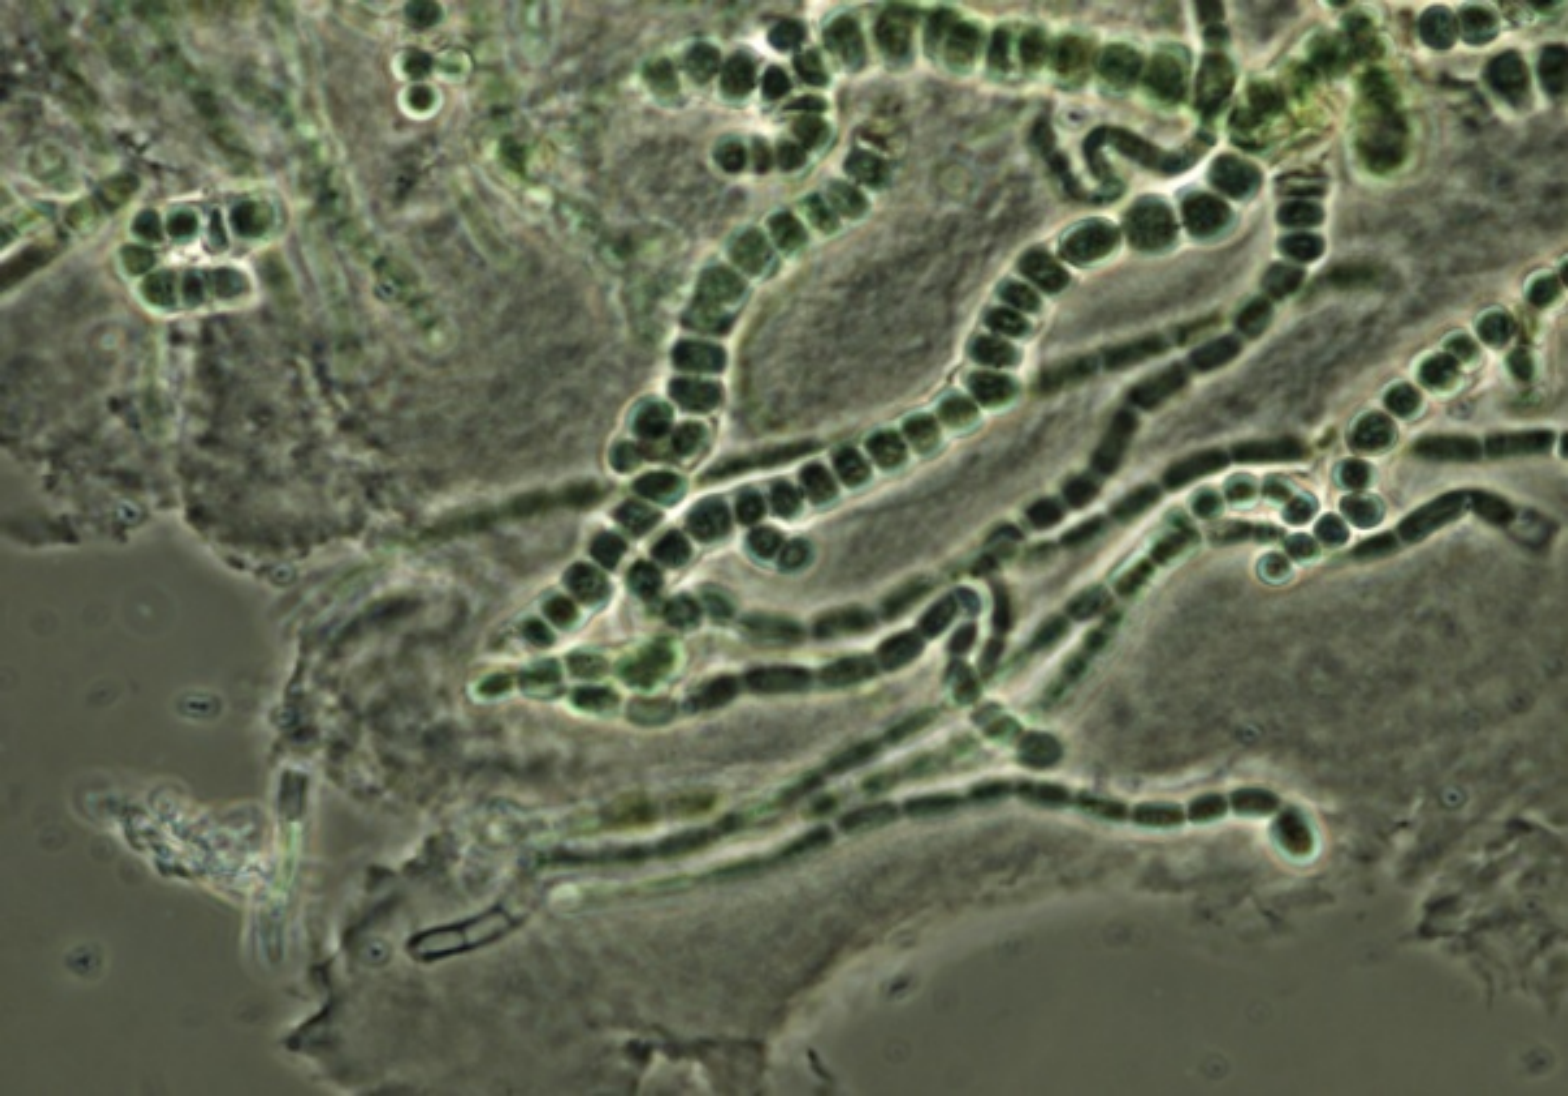

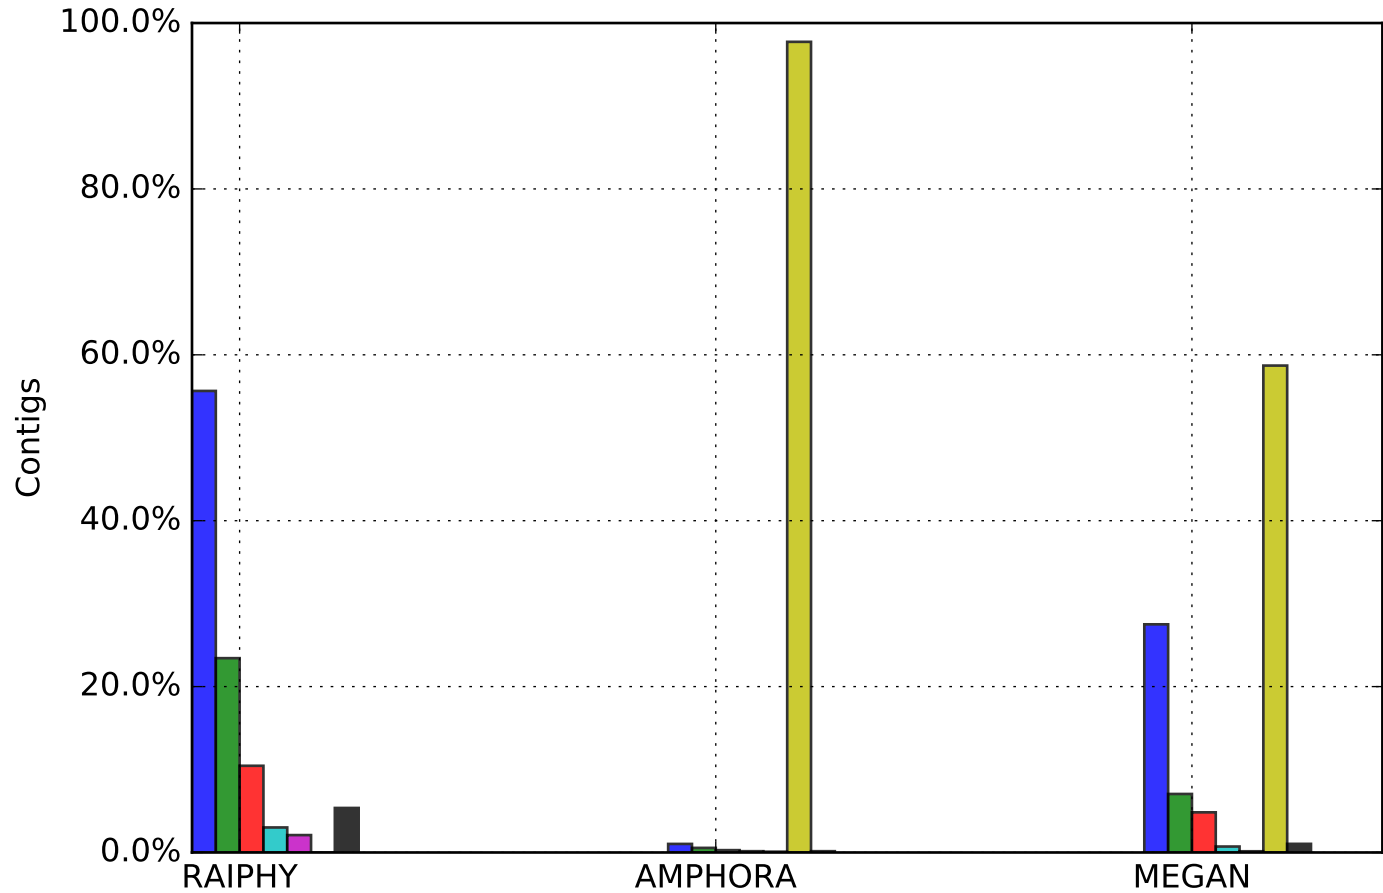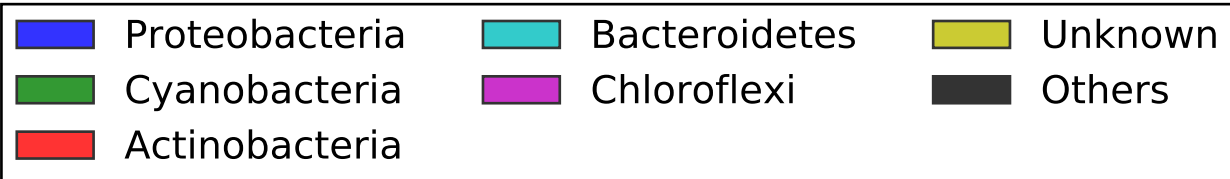

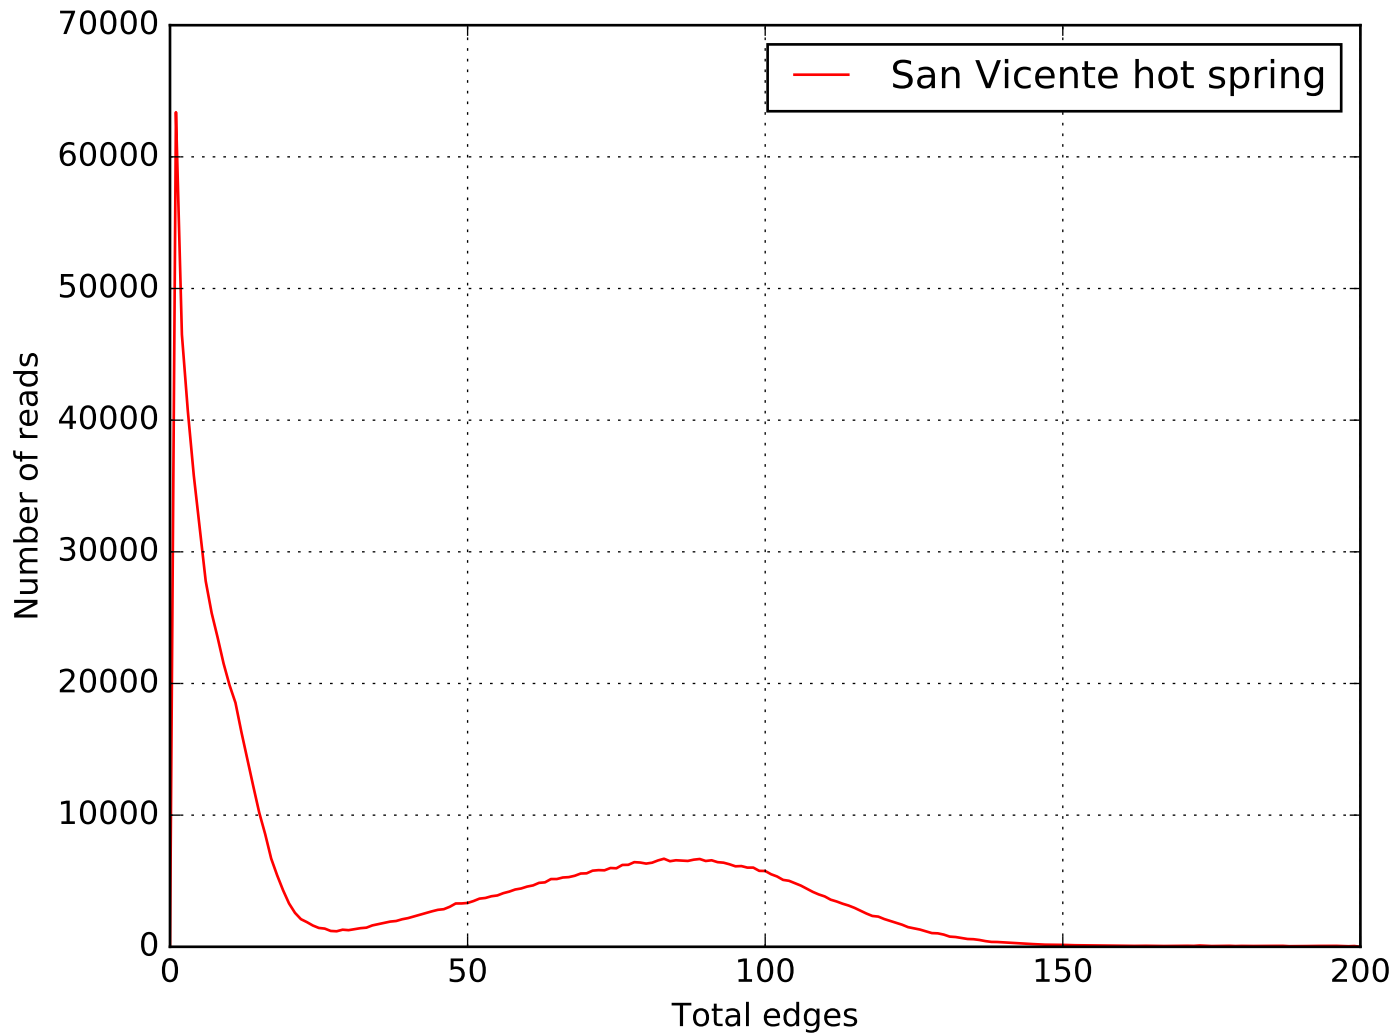



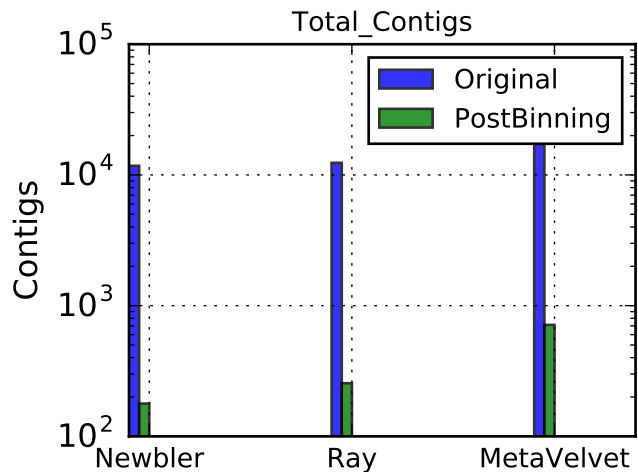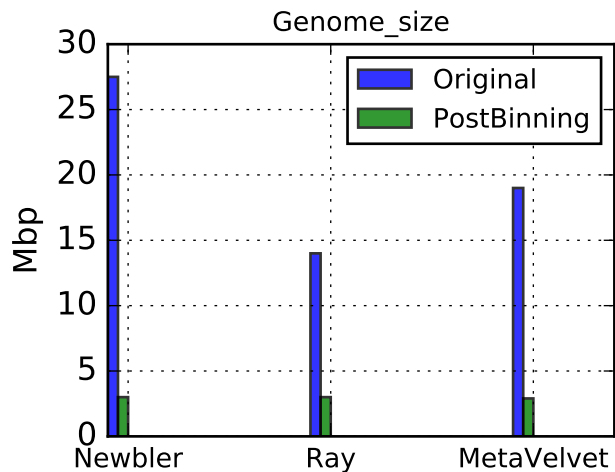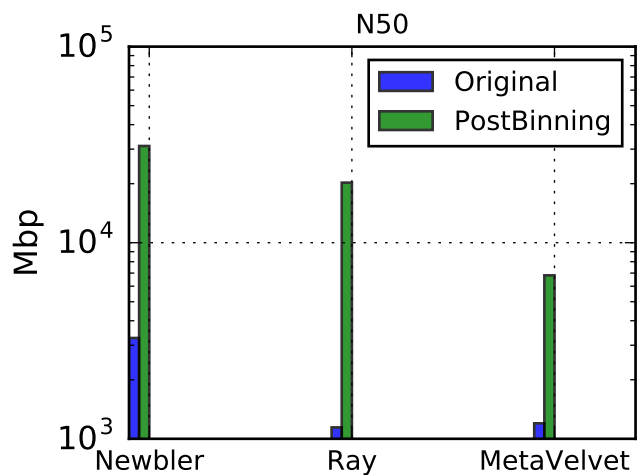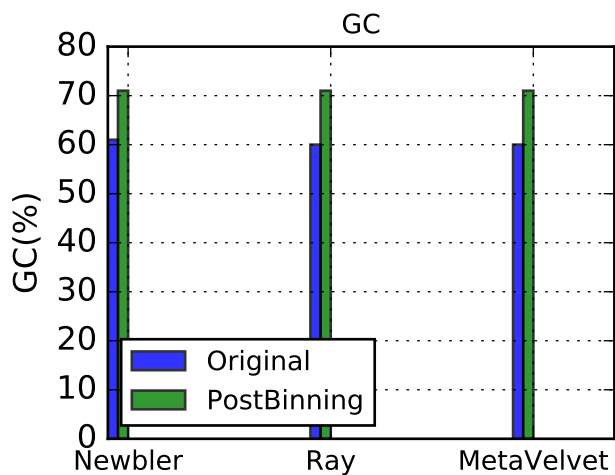

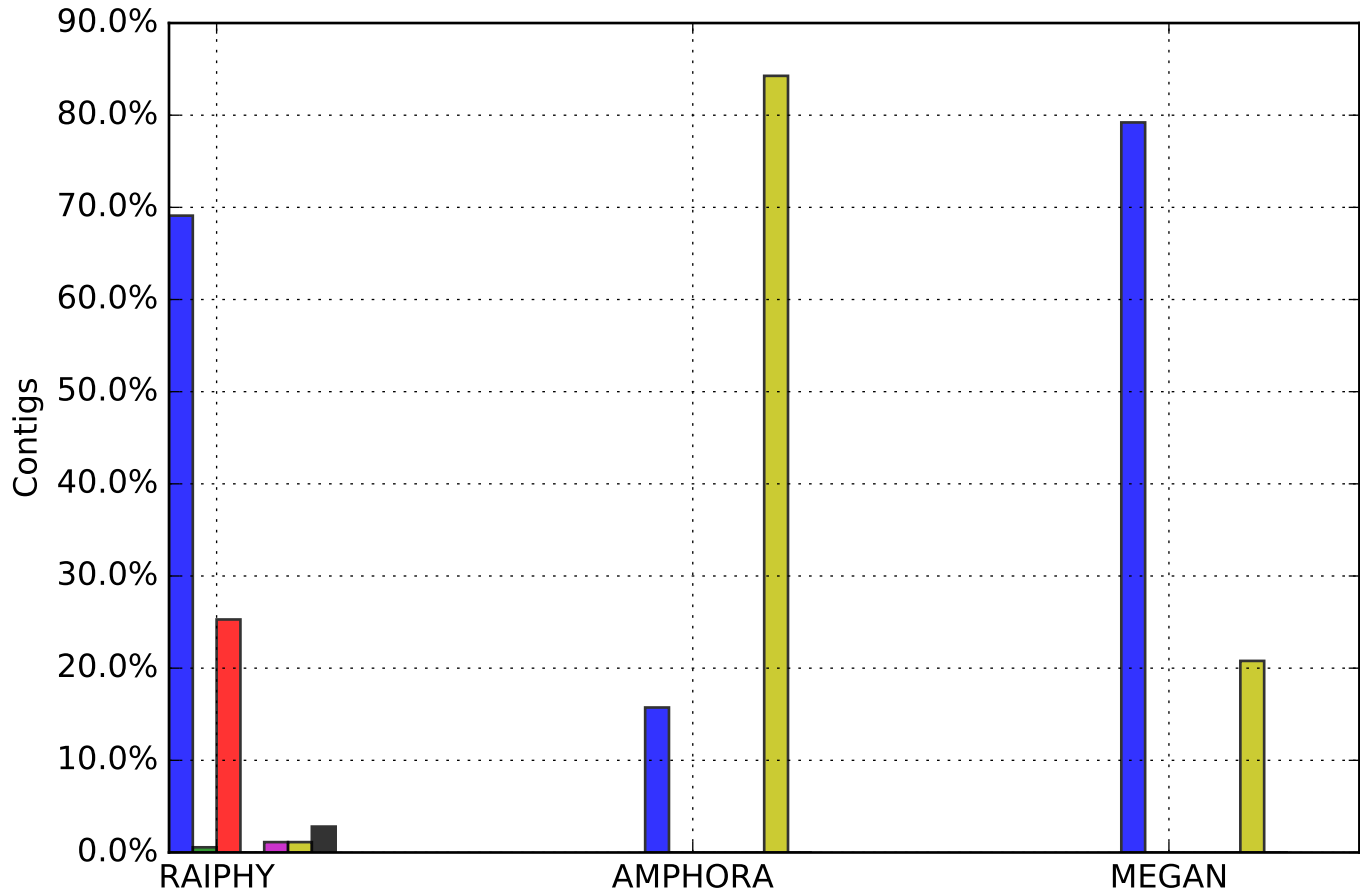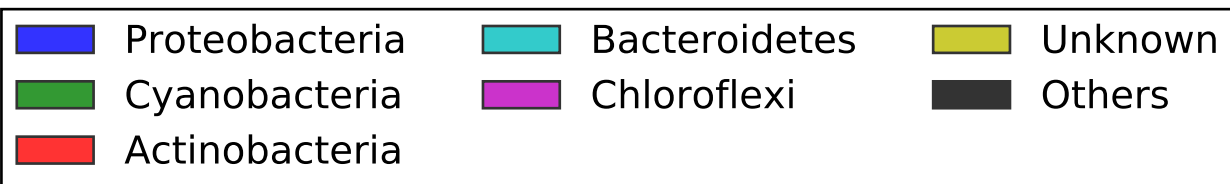

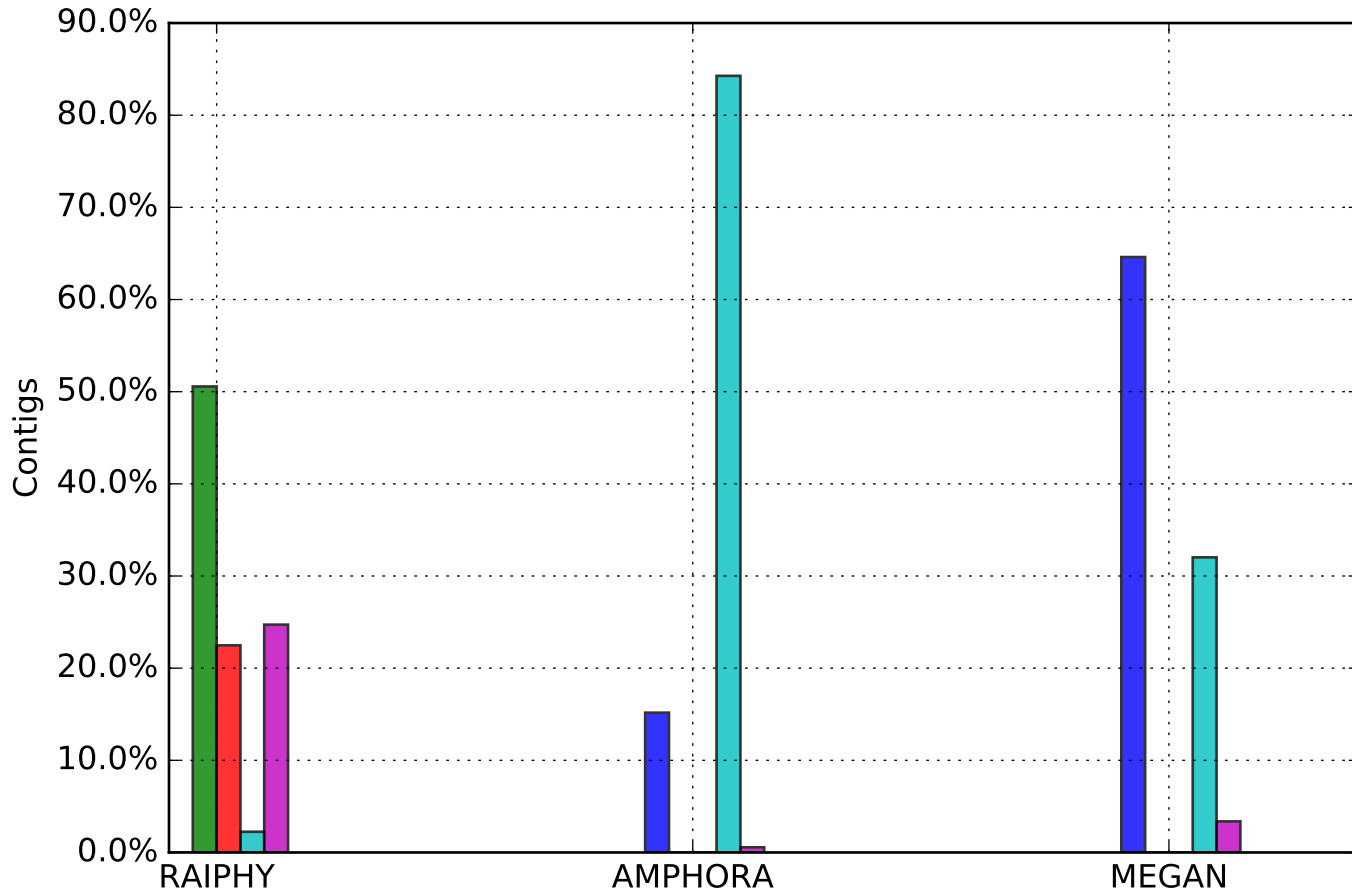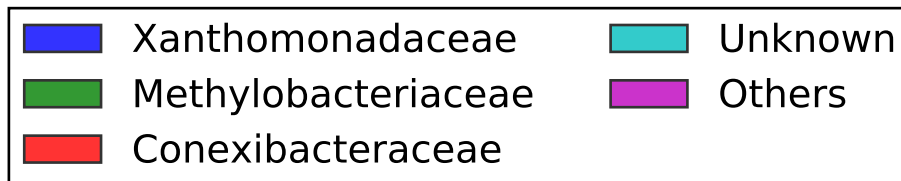

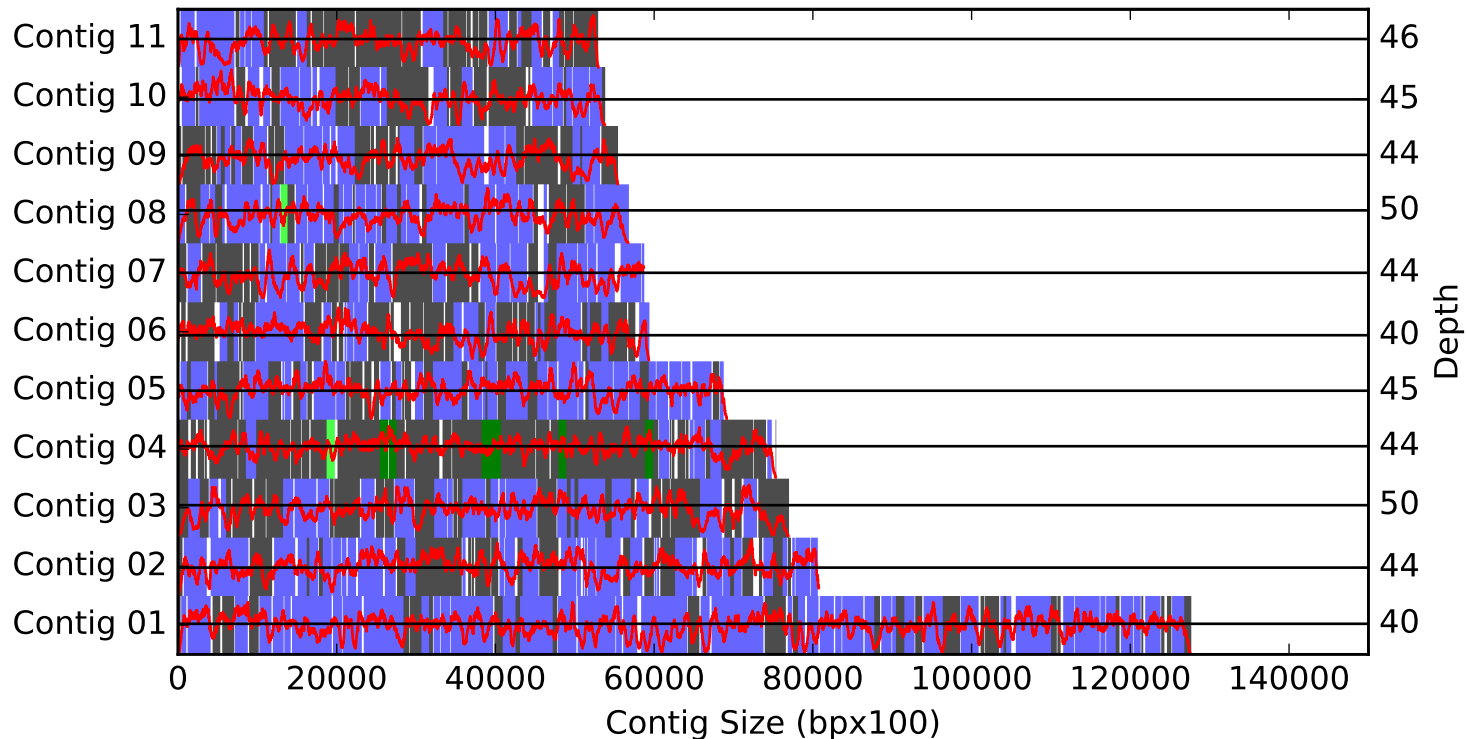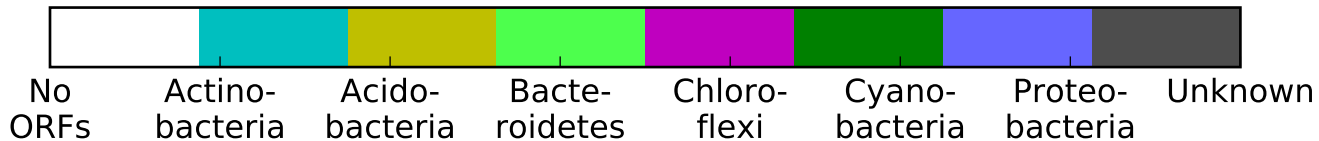

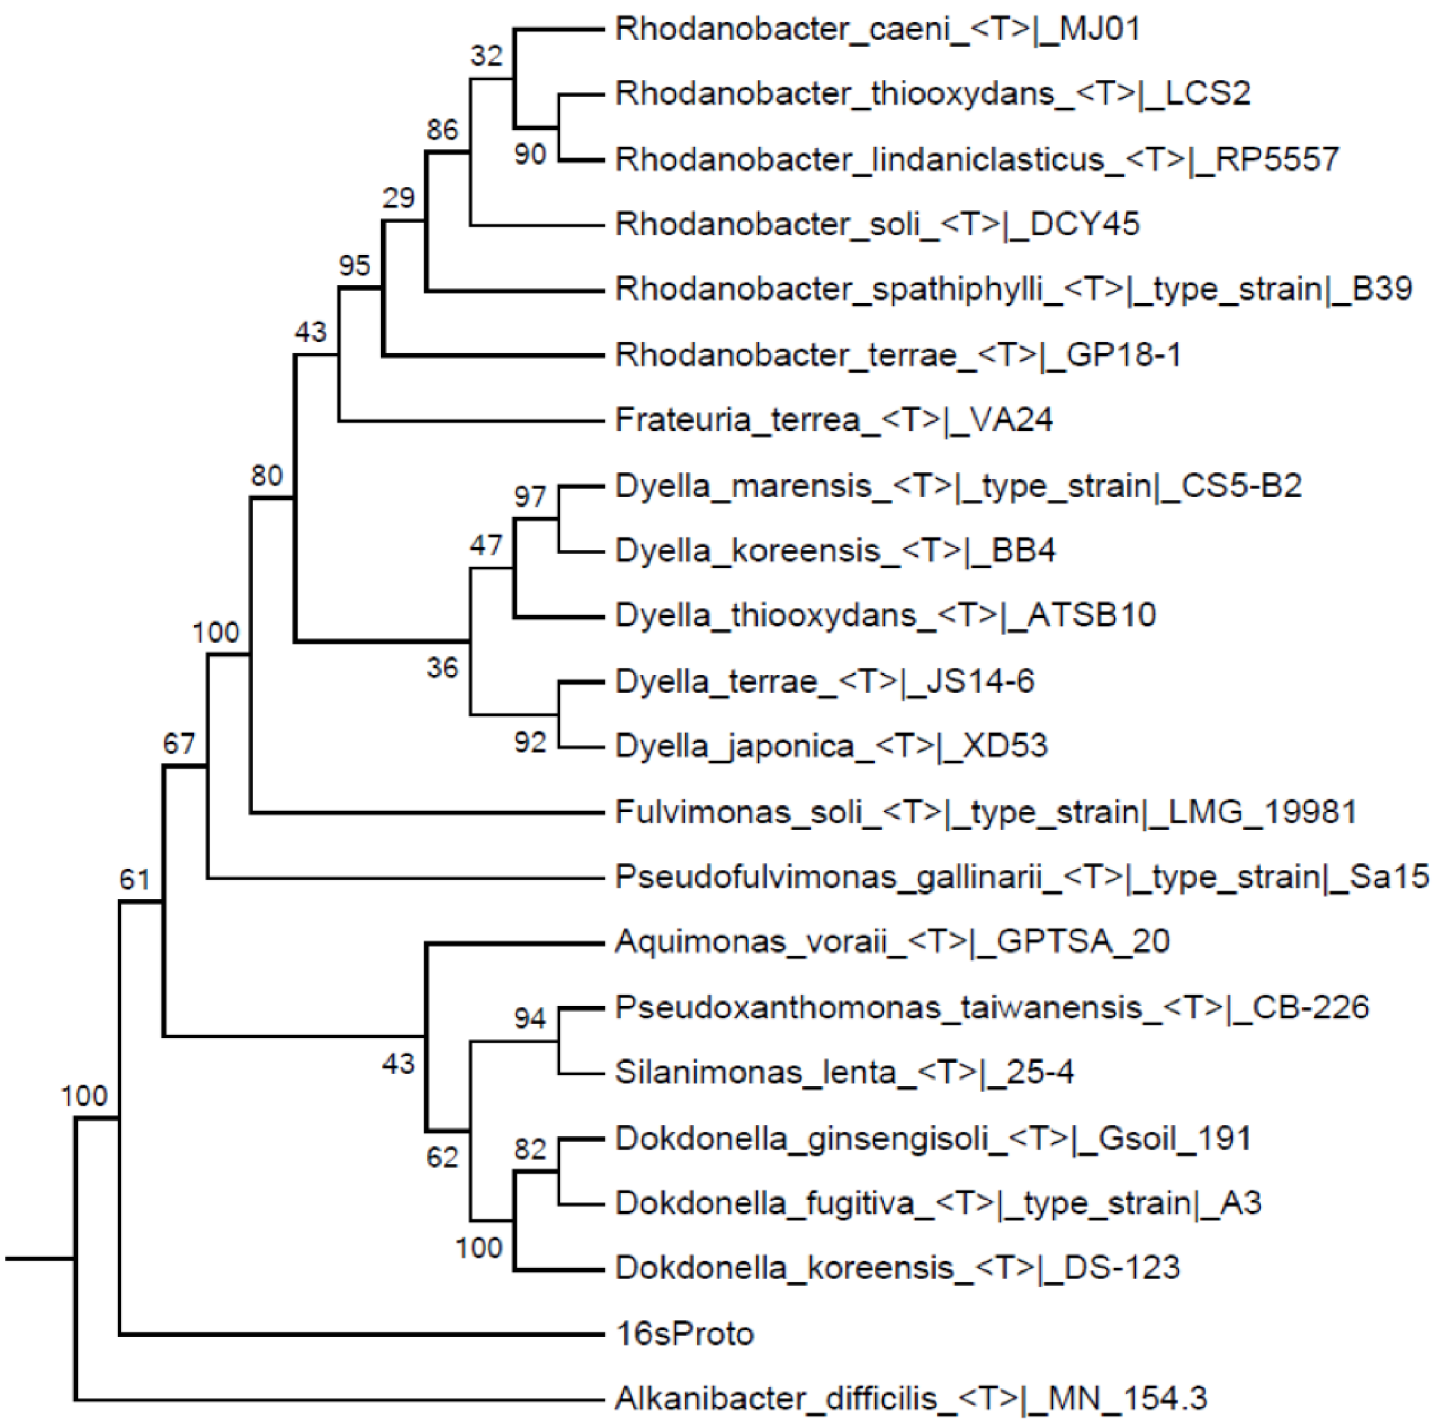

Gene Ontology terms

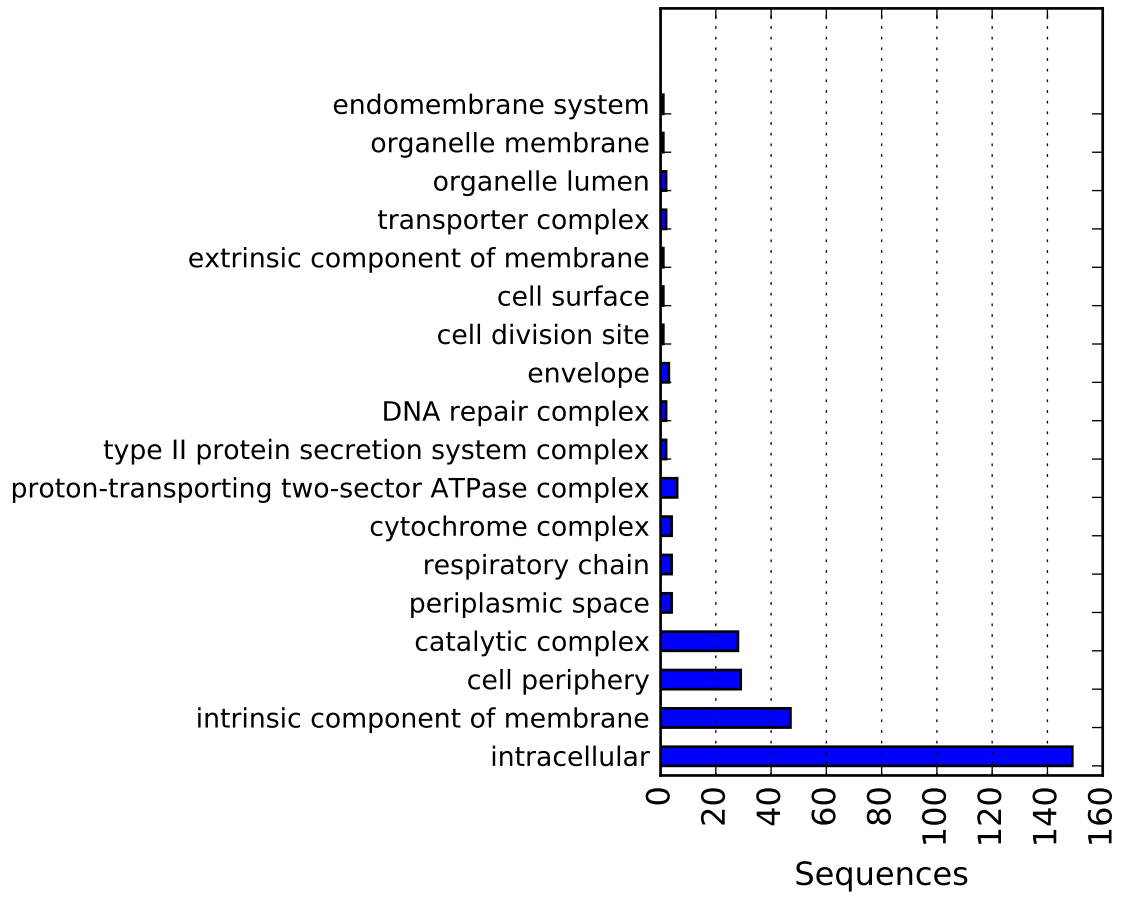

Gene Ontology terms

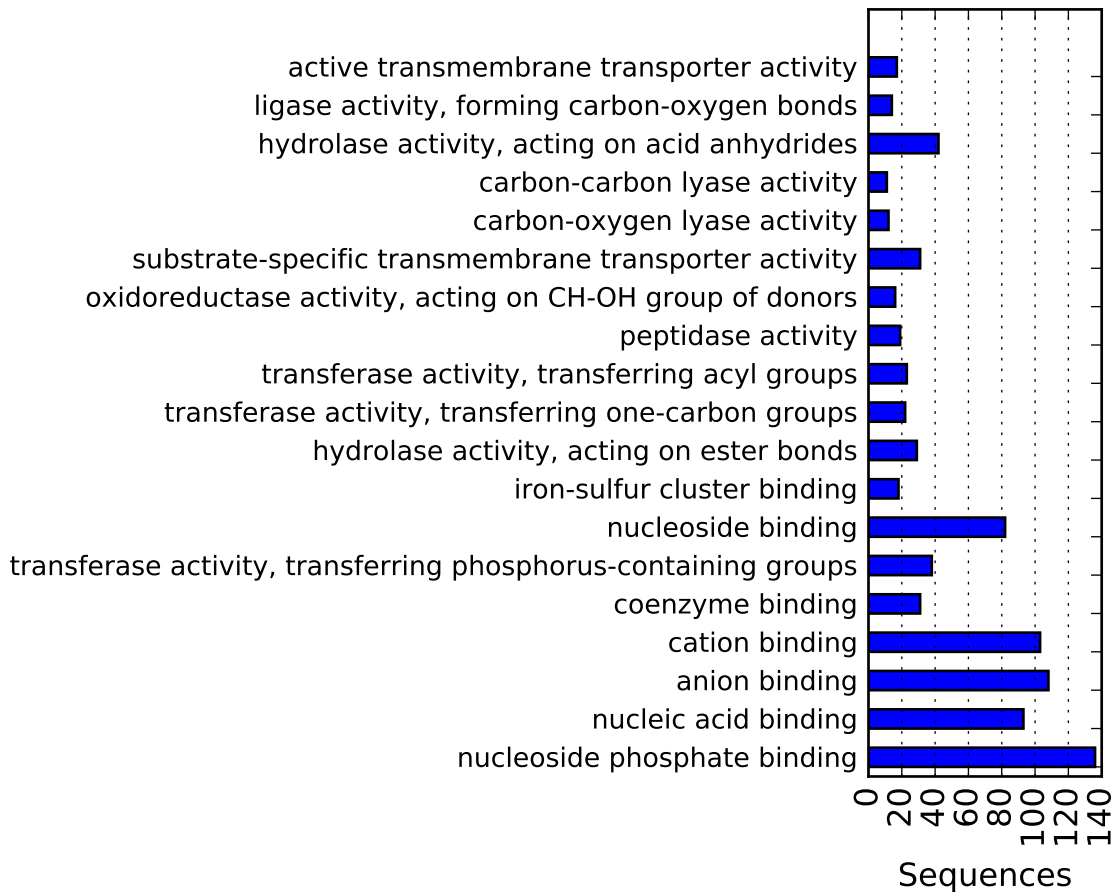

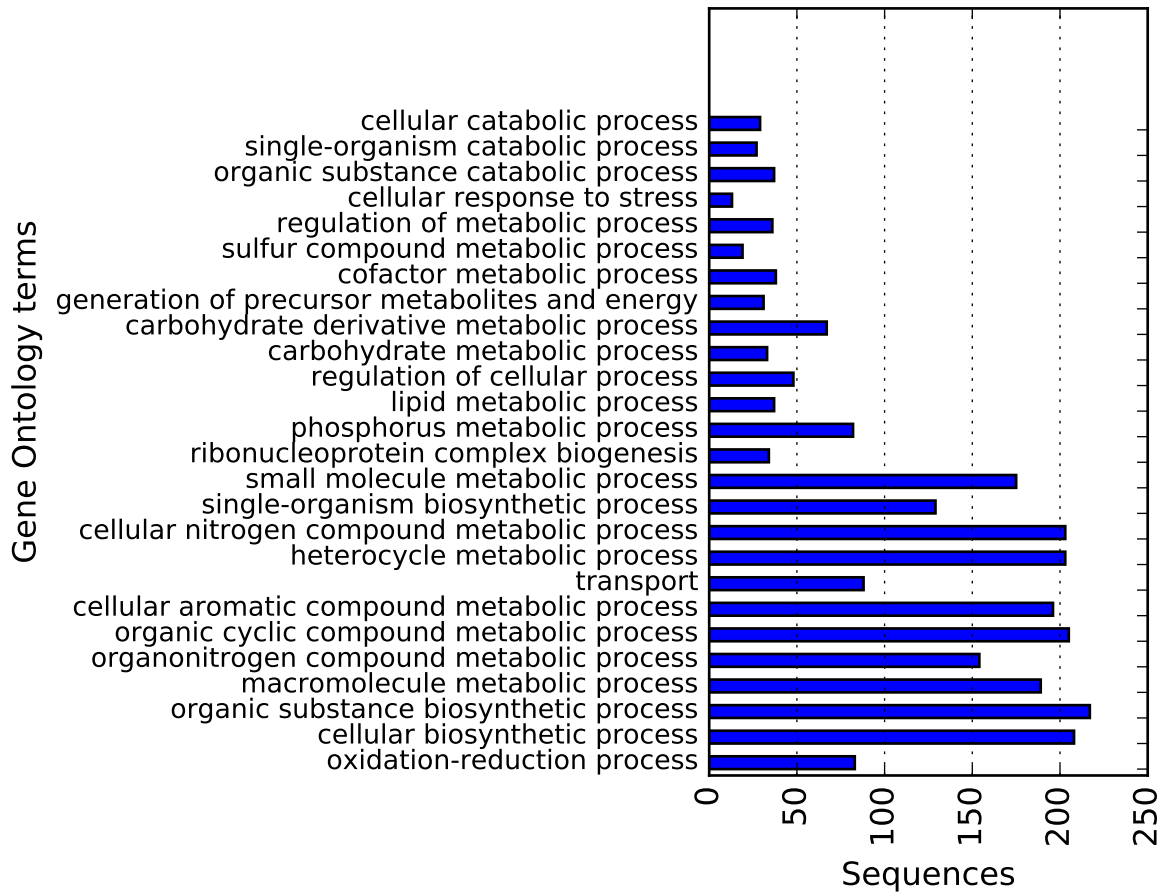



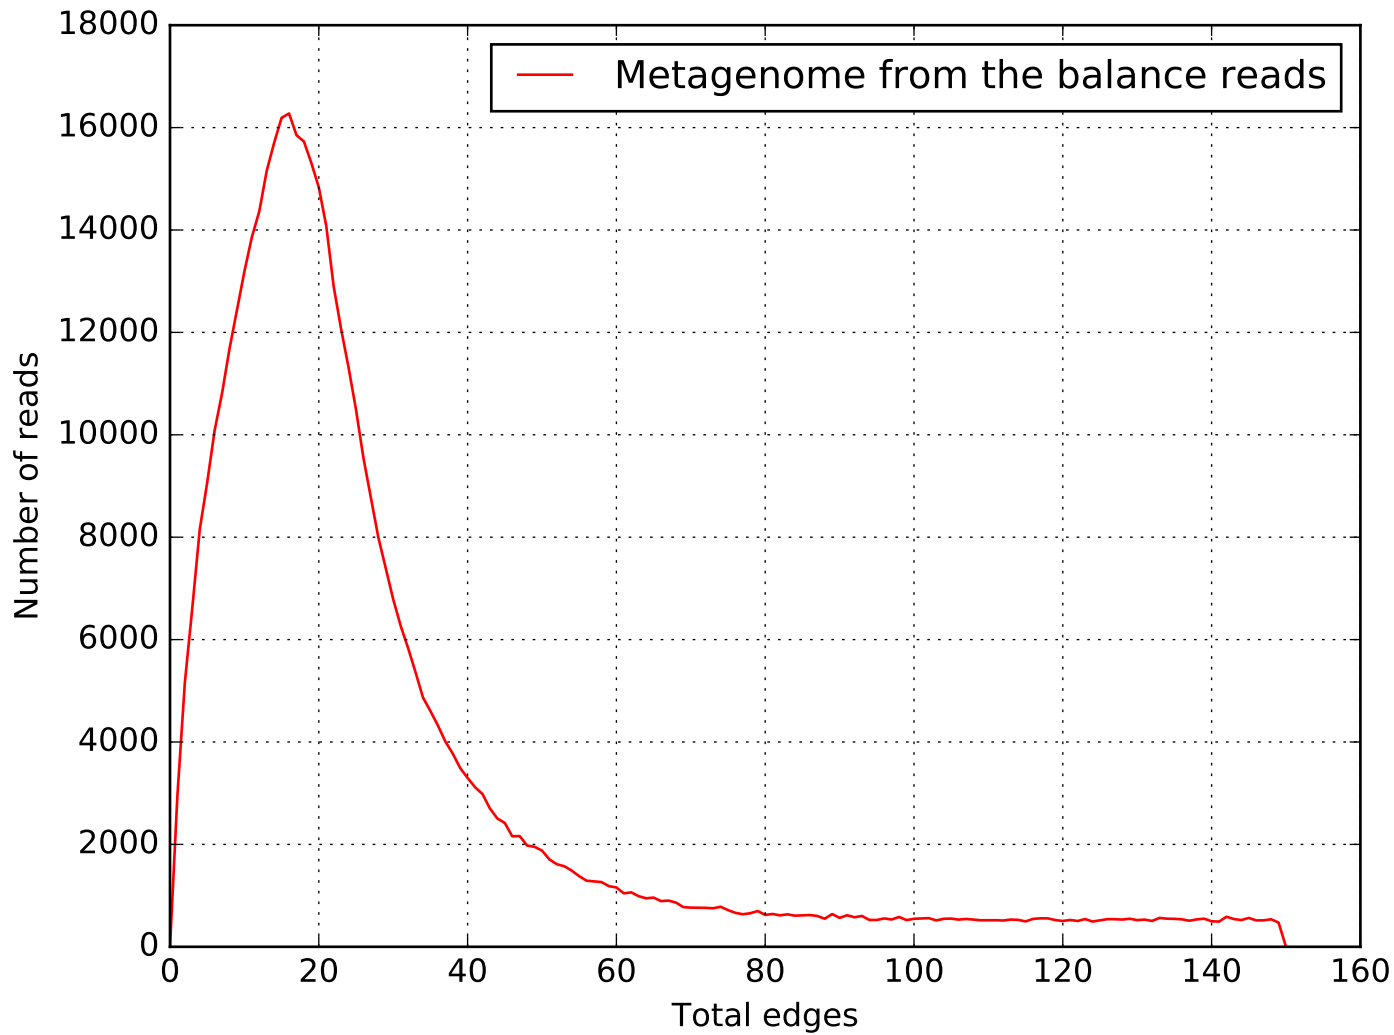

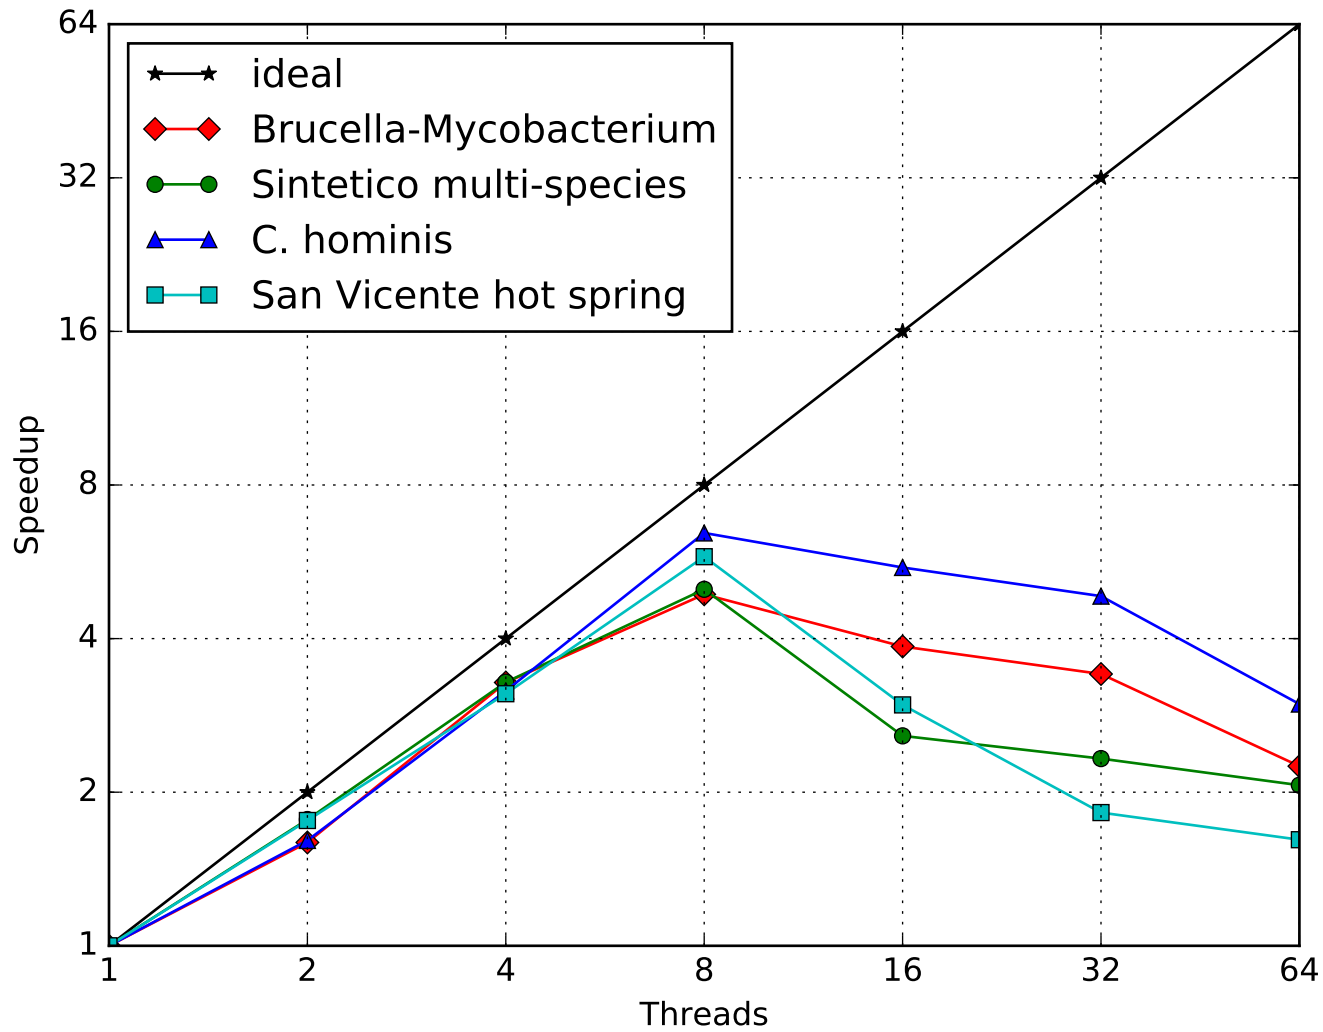

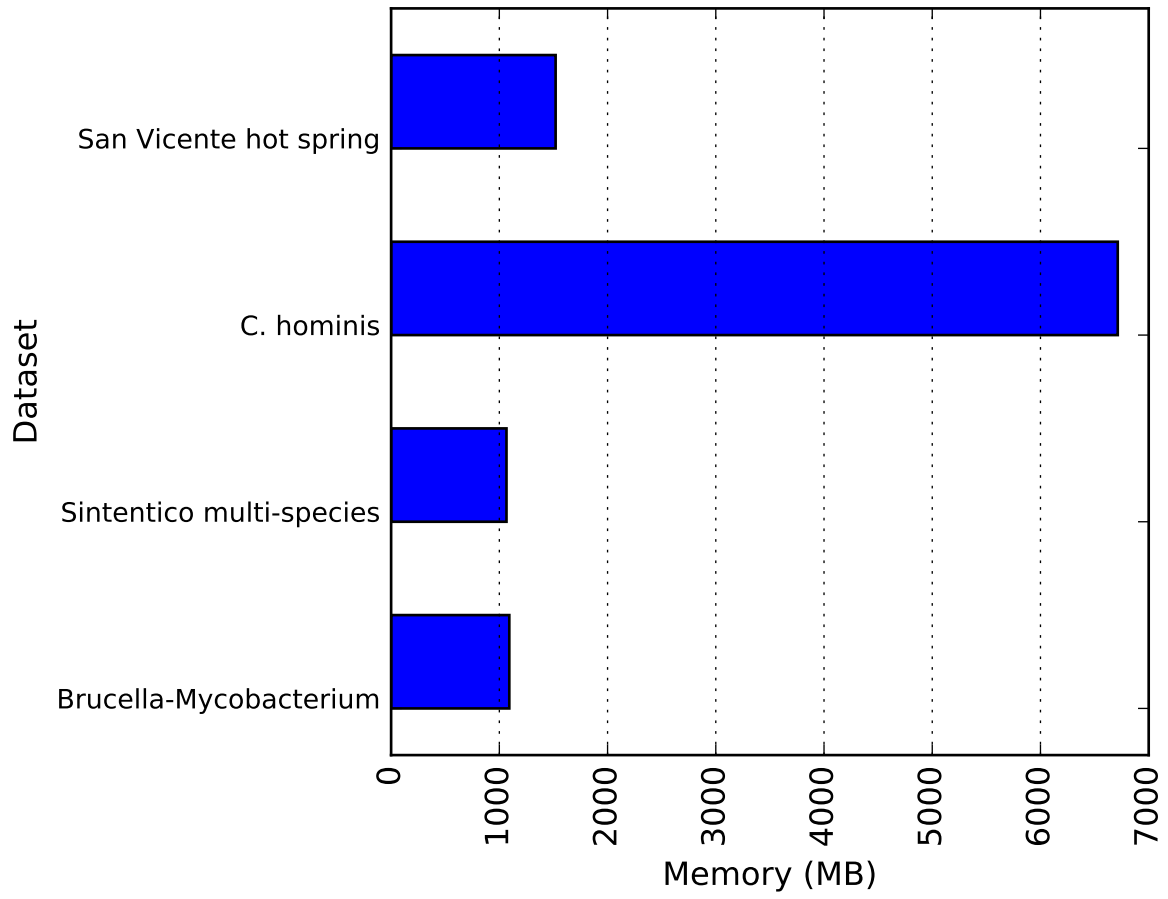

Supplement: 12864_2018_5191_MOESM3_ESM.pdf [file 12864_2018_5191_MOESM3_ESM.pdf]
